# Supplementary material for: Mapping pan-Arctic landfast sea ice stability using Sentinel-1 interferometry
Source: Copernicus journal article supplement (doi:10.5194/tc-13-557-2019), 2019-02-18
Supplement: Supplementary file 1 [file granule_names.docx]

Granule names for 52 Sentinel-1 interferogram pairs

All data was obtained from Alaska Satellite Facility (ASF) through the Vertex interface: https://vertex.daac.asf.alaska.edu/

The following granule pairs were used in the analysis. Please visit either the ASF website or the Copernicus Open Access Hub (https://scihub.copernicus.eu/) to download this data or obtain specific image data for each granule if needed.

S1B_IW_SLC__1SDV_20170207T220159_20170207T220227_004200_007472_6608

S1B_IW_SLC__1SDV_20170219T220159_20170219T220227_004375_0079BB_1794

S1B_IW_SLC__1SDV_20170410T214528_20170410T214552_005104_008EEB_EC4E

S1B_IW_SLC__1SDV_20170422T214529_20170422T214553_005279_0093F9_9D54

S1B_IW_SLC__1SSV_20170404T174055_20170404T174124_005014_008C4C_CF65

S1B_IW_SLC__1SSV_20170416T174055_20170416T174125_005189_00914D_396C

S1B_IW_SLC__1SDV_20170409T042610_20170409T042637_005079_008E2A_042C

S1B_IW_SLC__1SDV_20170503T042611_20170503T042638_005429_009846_80CA

S1B_IW_SLC__1SDV_20170409T042634_20170409T042701_005079_008E2A_74B3

S1B_IW_SLC__1SDV_20170503T042636_20170503T042703_005429_009846_FF7C

S1B_IW_SLC__1SDV_20170409T042659_20170409T042727_005079_008E2A_64F9

S1B_IW_SLC__1SDV_20170503T042700_20170503T042728_005429_009846_1CDD

S1B_IW_SLC__1SDV_20170411T041047_20170411T041115_005108_008F04_AA6A

S1B_IW_SLC__1SDV_20170423T041048_20170423T041116_005283_009411_E177

S1B_IW_SLC__1SDV_20170425T035437_20170425T035505_005312_0094E9_2372

S1B_IW_SLC__1SDV_20170507T035438_20170507T035506_005487_0099D5_C745

S1B_IW_SLC__1SDV_20170415T033809_20170415T033843_005166_0090A5_0938

S1B_IW_SLC__1SDV_20170509T033811_20170509T033844_005516_009AA2_1A0A

S1B_IW_SLC__1SDV_20170417T032145_20170417T032213_005195_009174_197E

S1B_IW_SLC__1SDV_20170429T032146_20170429T032213_005370_009693_63E2

S1A_IW_SLC__1SDV_20170408T025731_20170408T025759_016047_01A7BA_0AE8

S1A_IW_SLC__1SDV_20170502T025732_20170502T025800_016397_01B266_E201

S1A_IW_SLC__1SDV_20170410T024059_20170410T024124_016076_01A8A4_D81B

S1A_IW_SLC__1SDV_20170422T024059_20170422T024124_016251_01ADFF_1DBE

S1A_IW_SLC__1SDV_20170319T022428_20170319T022456_015755_019F03_9787

S1A_IW_SLC__1SDV_20170331T022428_20170331T022456_015930_01A436_0A19

S1A_IW_SLC__1SDV_20170309T020806_20170309T020834_015609_019AAA_D537

S1A_IW_SLC__1SDV_20170321T020806_20170321T020834_015784_019FDF_954A

S1A_IW_SLC__1SDV_20170311T015139_20170311T015207_015638_019B88_7EFD

S1A_IW_SLC__1SDV_20170323T015139_20170323T015207_015813_01A0BD_A650

S1A_IW_SLC__1SDV_20170406T013508_20170406T013536_016017_01A6CB_1453

S1A_IW_SLC__1SDV_20170418T013509_20170418T013537_016192_01AC29_5B91

S1B_IW_SLC__1SDV_20170414T175714_20170414T175744_005160_00907D_7BD5

S1B_IW_SLC__1SDV_20170426T175714_20170426T175744_005335_0095A1_41D5

S1B_IW_SLC__1SDV_20170302T180524_20170302T180554_004533_007E49_417C

S1B_IW_SLC__1SDV_20170314T180525_20170314T180554_004708_008377_CB43

S1B_IW_SLC__1SDV_20170422T182944_20170422T183014_005277_0093E8_7B58

S1B_IW_SLC__1SDV_20170504T182944_20170504T183014_005452_0098EB_2C77

S1B_IW_SLC__1SDV_20170408T184601_20170408T184631_005073_008DFF_9185

S1B_IW_SLC__1SDV_20170420T184602_20170420T184632_005248_00930E_AB18

S1B_IW_SLC__1SDV_20170418T190223_20170418T190253_005219_009225_4757

S1B_IW_SLC__1SDV_20170430T190224_20170430T190254_005394_00973E_0162

S1B_IW_SLC__1SDV_20170404T191847_20170404T191917_005015_008C53_6471

S1B_IW_SLC__1SDV_20170416T191847_20170416T191917_005190_009154_CD89

S1B_IW_SLC__1SDV_20170402T193511_20170402T193541_004986_008B84_E3F0

S1B_IW_SLC__1SDV_20170414T193512_20170414T193542_005161_009085_F737

S1B_IW_SLC__1SDV_20170331T195136_20170331T195205_004957_008AAB_BD13

S1B_IW_SLC__1SDV_20170424T195137_20170424T195206_005307_0094C8_9EF6

S1B_IW_SLC__1SDV_20170410T200749_20170410T200819_005103_008EE2_C9FE

S1B_IW_SLC__1SDV_20170422T200750_20170422T200820_005278_0093F0_9EB3

S1B_IW_SLC__1SDV_20170420T202408_20170420T202438_005249_009315_A81C

S1B_IW_SLC__1SDV_20170502T202408_20170502T202438_005424_009823_2581

S1B_IW_SLC__1SDV_20170313T204021_20170313T204048_004695_00831C_171A

S1B_IW_SLC__1SDV_20170406T204021_20170406T204048_005045_008D32_7C08

S1B_IW_SLC__1SDV_20170416T205646_20170416T205713_005191_00915A_2A40

S1B_IW_SLC__1SDV_20170428T205647_20170428T205714_005366_009679_FAF2

S1B_IW_SLC__1SDV_20170412T212929_20170412T212956_005133_008FB9_80D0

S1B_IW_SLC__1SDV_20170424T212930_20170424T212957_005308_0094D3_58C2

S1B_IW_SLC__1SDV_20170424T212955_20170424T213022_005308_0094D3_4C51

S1B_IW_SLC__1SDV_20170506T212955_20170506T213022_005483_0099BF_D037

S1B_IW_SLC__1SDV_20170317T214628_20170317T214658_004754_0084E1_3B83

S1B_IW_SLC__1SDV_20170329T214628_20170329T214658_004929_0089E0_90BA

S1B_IW_SLC__1SDV_20170408T220224_20170408T220254_005075_008E13_DF4B

S1B_IW_SLC__1SDV_20170502T220226_20170502T220255_005425_009830_7086

S1B_IW_SLC__1SDV_20170502T220253_20170502T220321_005425_009830_87D1

S1B_IW_SLC__1SDV_20170514T220254_20170514T220322_005600_009CF8_B672

S1B_IW_SLC__1SDV_20170428T223511_20170428T223541_005367_009686_0C1D

S1B_IW_SLC__1SDV_20170510T223512_20170510T223542_005542_009B54_E874

S1B_IW_SLC__1SDV_20170501T225945_20170501T230015_005411_0097C1_AA21

S1B_IW_SLC__1SDV_20170513T225945_20170513T230015_005586_009C8A_20B8

S1B_IW_SLC__1SDV_20170504T232417_20170504T232445_005455_009907_733F

S1B_IW_SLC__1SDV_20170516T232417_20170516T232445_005630_009DCA_53AB

S1B_IW_SLC__1SDV_20170422T232348_20170422T232418_005280_009404_5ABB

S1B_IW_SLC__1SDV_20170504T232349_20170504T232419_005455_009907_C88E

S1B_IW_SLC__1SDV_20170320T234812_20170320T234842_004799_00861B_D1E8

S1B_IW_SLC__1SDV_20170401T234813_20170401T234842_004974_008B29_A218

S1B_IW_SLC__1SDV_20170405T001229_20170405T001259_005018_008C6E_6947

S1B_IW_SLC__1SDV_20170417T001230_20170417T001300_005193_00916E_CA46

S1B_IW_SLC__1SDV_20170405T001257_20170405T001325_005018_008C6E_01EE

S1B_IW_SLC__1SDV_20170417T001258_20170417T001326_005193_00916E_AB60

S1B_IW_SLC__1SDV_20170509T020942_20170509T021010_005515_009A9F_ABDC

S1B_IW_SLC__1SDV_20170502T003741_20170502T003808_005412_0097CA_7260

S1B_IW_SLC__1SDV_20170427T021031_20170427T021058_005340_0095C6_9A9C

S1B_IW_SLC__1SDV_20170427T021007_20170427T021034_005340_0095C6_A66C

S1B_IW_SLC__1SDV_20170427T020941_20170427T021009_005340_0095C6_A486

S1B_IW_SLC__1SDV_20170427T020913_20170427T020943_005340_0095C6_0B60

S1B_IW_SLC__1SDV_20170426T012825_20170426T012853_005325_00954C_F5FD

S1B_IW_SLC__1SDV_20170426T012800_20170426T012827_005325_00954C_9C51

S1B_IW_SLC__1SDV_20170423T010327_20170423T010354_005281_00940A_BD44

S1B_IW_SLC__1SDV_20170423T010302_20170423T010329_005281_00940A_55BA

S1B_IW_SLC__1SDV_20170423T010237_20170423T010304_005281_00940A_17B8

S1B_IW_SLC__1SDV_20170420T003740_20170420T003807_005237_0092B4_1C2D

S1B_IW_SLC__1SDV_20170415T021031_20170415T021058_005165_0090A2_80E5

S1B_IW_SLC__1SDV_20170415T021006_20170415T021033_005165_0090A2_8F7F

S1B_IW_SLC__1SDV_20170415T020913_20170415T020943_005165_0090A2_6DF8

S1B_IW_SLC__1SDV_20170413T022638_20170413T022708_005136_008FCD_FCF8

S1B_IW_SLC__1SDV_20170411T010326_20170411T010353_005106_008EFC_73AF

S1B_IW_SLC__1SDV_20170411T010301_20170411T010328_005106_008EFC_B99C

S1B_IW_SLC__1SDV_20170411T010236_20170411T010303_005106_008EFC_75FC

S1B_IW_SLC__1SDV_20170402T012824_20170402T012852_004975_008B30_F92B

S1B_IW_SLC__1SDV_20170402T012759_20170402T012826_004975_008B30_9844

S1B_IW_SLC__1SDV_20170401T022637_20170401T022707_004961_008ACB_ED00

S1B_IW_SLC__1SDV_20170330T024259_20170330T024329_004932_0089F7_0B92

S1B_IW_SLC__1SDV_20170318T024259_20170318T024329_004757_0084F6_8FE7
