# Supplementary material for: Mapping pan-Arctic landfast sea ice stability using Sentinel-1 interferometry
Source: Copernicus journal article supplement (doi:10.5194/tc-13-557-2019), 2019-02-18
Supplement: Supplementary file 1 [file tc-13-557-2019-supplement.zip]

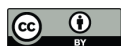

*Supplement of*

## **Mapping pan-Arctic landfast sea ice stability using Sentinel-1 interferometry**

**Dyre O. Dammann et al.**

*Correspondence to:* Dyre O. Dammann ([dyre.dammann@chalmers.se](mailto:dyre.dammann@chalmers.se))

- [tc-13-557-2019-supplement-title-page.pdf](#)
- [supplementary\\_material](#)
  - [.DS\\_Store](#)
  - [Ice\\_stability\\_zones.zip](#)
  - [granule\\_names.docx](#)
  - [supplementary\\_data\\_stability\\_zones.docx](#)
  - [anule\\_names.docx](#)

The copyright of individual parts of the supplement might differ from the CC BY 4.0 License.
