# Supplementary material for: Mapping pan-Arctic landfast sea ice stability using Sentinel-1 interferometry
Source: Copernicus journal article supplement (doi:10.5194/tc-13-557-2019), 2019-02-18
Supplement: Supplementary file 2 [file supplementary_data_stability_zones.docx]

Stability zones derived from 52 Sentinel-1 interferograms during spring 2017

The shapefiles contain mapped landfast ice (combined stabilized and non-stabilized), stabilized ice, bottomfast sea ice, and total coverage. The files are separated into the Beaufort, Chukchi, East Siberian, Laptev and Kara Seas. Together these shapefiles cover the areas described in the manuscript.
